# Supplementary material for: Expression profiling of cultured podocytes exposed to nephrotic plasma reveals intrinsic molecular signatures of nephrotic syndrome
Source: PubMed Central journal article supplement — Clin Exp Pediatr. 2020 Nov 1;64(7):355–63. doi: 10.3345/cep.2020.00619 (PMC8255511; doi:10.3345/cep.2020.00619), 2020-11-01
Supplement: cep-2020-00619-suppl1.pdf [file cep-2020-00619-suppl1.pdf]

### Supplementary Table 1. Selection criteria of the subjects

| Inclusion criteria                                                                                | Exclusion criteria                                                                                                                                                                                     |
|---------------------------------------------------------------------------------------------------|--------------------------------------------------------------------------------------------------------------------------------------------------------------------------------------------------------|
| Newly diagnosed with NS or a known case SSNS in a relapse (with a follow-up of at least 6 months) | SRNS with a known pathogenic mutation (patients will be screened for the common mutations in <i>NPHS2</i> and <i>WT1</i> )                                                                             |
| SRNS                                                                                              | NS with multiple organ involvement or systemic features (e.g., syndromic child, SLE, vasculitis)                                                                                                       |
| Post renal transplants with recurrence of NS.                                                     | Biopsy proven NS other than MCD and FSGS (e.g., Membranous nephropathy, membrano-proliferative glomerulonephritis, IgA nephropathy)<br>NS with CKD stage II–V at time of screening<br>Refusing consent |

NS, nephrotic syndrome; SSNS, steroid-susceptible nephrotic syndrome; SRNS, steroid-resistant nephrotic syndrome; MCD, minimal-change disease; CKD, chronic kidney disease.
