# Supplementary material for: Expression profiling of cultured podocytes exposed to nephrotic plasma reveals intrinsic molecular signatures of nephrotic syndrome
Source: PubMed Central journal article supplement — Clin Exp Pediatr. 2020 Nov 1;64(7):355–63. doi: 10.3345/cep.2020.00619 (PMC8255511; doi:10.3345/cep.2020.00619), 2020-11-01
Supplement: cep-2020-00619-suppl2.pdf [file cep-2020-00619-suppl2.pdf]

**Supplementary Table 2. Primer sequences and annealing temperature of candidate**

| Gene          | Primer sequence                                       | Annealing temperature |
|---------------|-------------------------------------------------------|-----------------------|
| <i>ID1</i>    | FP: CGCTCCTCTCTGCACACC<br>RP: AAATAGAAACACACGAGTGAATC | 64°C                  |
| <i>ID3</i>    | FP: CTGGAGTTGGCAGACGTTT<br>RP: TTGTCCCTCTCTGGCCTCA    | 62°C                  |
| <i>SOCS3</i>  | FP: AGGCTCCTTTGTGGACTTCA<br>RP: TCCCGAATCGAAGTCTCCGT  | 58°C                  |
| <i>FOSB</i>   | FP: GCCACTCCCTCCCAGAAA<br>RP: AAGGCTGGGGCTGATTT       | 60°C                  |
| <i>SMAD7</i>  | FP: ACAACAAGAGTCAGCTGGTG<br>RP: CTGTACGCCTTCTCGTAGTC  | 62°C                  |
| <i>TAGLN2</i> | FP: AGCTCATTAAATGCACTGTACC<br>RP: TCCACAGTTTGAAGATGTC | 64°C                  |
| <i>FMC1</i>   | FP: ACCAGTGAAAAGTTGTGCAG<br>RP: CAACTTGAGACCCACCAA    | 58°C                  |
| <i>LAMC3</i>  | FP: GAAGGTGGCAAAAGCCGAG<br>RP: CACTTGGCTGTGAGTTCGTC   | 60°C                  |
| <i>LTBR</i>   | FP: GCGGGTCTATGACTATCACT<br>RP: GGTGATAAATTGGTTCCTTG  | 60°C                  |
| <i>BAP1</i>   | FP: CTACGACCTTCAGAGCAAAT<br>RP: GTTGACACAAGAGTTGGGTAT | 58°C                  |

FP, forward primer; RP, reverse primer.
