# Supplementary material for: Expression profiling of cultured podocytes exposed to nephrotic plasma reveals intrinsic molecular signatures of nephrotic syndrome
Source: PubMed Central journal article supplement — Clin Exp Pediatr. 2020 Nov 1;64(7):355–63. doi: 10.3345/cep.2020.00619 (PMC8255511; doi:10.3345/cep.2020.00619), 2020-11-01
Supplement: cep-2020-00619-suppl3.pdf [file cep-2020-00619-suppl3.pdf]

**Supplementary Table 3. Significant genes identified to be differentially expressed in podocytes exposed to plasma from SSNS and SRNS compared to that of healthy controls**

| SI No.              | Gene symbol          | Entrez IDs | Log fold change in SSNS | Log fold change in SRNS |
|---------------------|----------------------|------------|-------------------------|-------------------------|
| <b>Common genes</b> |                      |            |                         |                         |
| 1                   | <i>EGR2</i>          | 1959       | 2.90                    | 2.82                    |
| 2                   | <i>FOSB</i>          | 2354       | 3.21                    | 2.76                    |
| 3                   | <i>EGR1</i>          | 1958       | 3.04                    | 2.36                    |
| 4                   | <i>NR4A3</i>         | 8013       | 2.39                    | 2.23                    |
| 5                   | <i>TMEM88</i>        | 92162      | 1.65                    | 2.17                    |
| 6                   | <i>BHLHE40</i>       | 8553       | 1.66                    | 2.00                    |
| 7                   | <i>IL11</i>          | 3589       | 1.33                    | 1.92                    |
| 8                   | <i>ID1</i>           | 3397       | 1.97                    | 1.87                    |
| 9                   | <i>DLX2</i>          | 1746       | 1.33                    | 1.87                    |
| 10                  | <i>SNAI1</i>         | 6615       | 1.59                    | 1.86                    |
| 11                  | <i>GADD45B</i>       | 4616       | 1.44                    | 1.81                    |
| 12                  | <i>RASD1</i>         | 51655      | 1.44                    | 1.78                    |
| 13                  | <i>DUSP1</i>         | 1843       | 1.69                    | 1.65                    |
| 14                  | <i>KLF10</i>         | 7071       | 1.39                    | 1.62                    |
| 15                  | <i>JUNB</i>          | 7326       | 1.23                    | 1.59                    |
| 16                  | <i>CSRNP1</i>        | 64651      | 1.76                    | 1.55                    |
| 17                  | <i>GPR183</i>        | 1880       | 1.40                    | 1.48                    |
| 18                  | <i>RPL29</i>         | 6159       | 1.32                    | 1.48                    |
| 19                  | <i>DUSP5</i>         | 1847       | 1.30                    | 1.41                    |
| 20                  | <i>SMAD7</i>         | 4092       | 1.21                    | 1.36                    |
| 21                  | <i>ZFP36</i>         | 7538       | 1.32                    | 1.30                    |
| 22                  | <i>ID3</i>           | 3399       | 1.99                    | 1.26                    |
| 23                  | <i>IFI6</i>          | 2537       | 1.24                    | 1.25                    |
| 24                  | <i>A_33_P3413997</i> | -          | 1.20                    | 1.19                    |
| 25                  | <i>IFI44L</i>        | 10964      | 1.12                    | 1.18                    |
| 26                  | <i>BCL3</i>          | 602        | 1.01                    | 1.12                    |
| 27                  | <i>LINC00473</i>     | 90632      | 1.33                    | 1.10                    |
| 28                  | <i>IFIT3</i>         | 3437       | 1.17                    | 1.08                    |
| 29                  | <i>OASL</i>          | 8638       | 1.04                    | 1.07                    |
| 30                  | <i>MX2</i>           | 4600       | 1.12                    | 1.02                    |
| 31                  | <i>XLOC_001300</i>   | -          | -1.03                   | -1.00                   |
| 32                  | <i>LOC389791</i>     | 389791     | -1.14                   | -1.00                   |
| 33                  | <i>A_33_P3223860</i> | -          | -1.30                   | -1.04                   |
| 34                  | <i>FFAR3</i>         | 2865       | -1.15                   | -1.05                   |
| 35                  | <i>XLOC_010037</i>   | -          | -1.09                   | -1.09                   |
| 36                  | <i>XLOC_005166</i>   | -          | -1.03                   | -1.10                   |
| 37                  | <i>URM1</i>          | 81605      | -1.05                   | -1.16                   |
| 38                  | <i>XLOC_001286</i>   | -          | -1.11                   | -1.16                   |
| 39                  | <i>LOC644656</i>     | 644656     | -1.31                   | -1.26                   |
| 40                  | <i>LOC100506458</i>  | 100506458  | -1.39                   | -1.27                   |
| 41                  | <i>CD6</i>           | 923        | -1.32                   | -1.29                   |
| 42                  | <i>SNTG2</i>         | 54221      | -1.39                   | -1.30                   |
| 43                  | <i>LAMC3</i>         | 10319      | -1.19                   | -1.33                   |
| 44                  | <i>LOC100505976</i>  | 100505976  | -1.34                   | -1.36                   |
| 45                  | <i>PYHIN1</i>        | 149628     | -1.32                   | -1.37                   |
| 46                  | <i>XLOC_004530</i>   | -          | -1.61                   | -1.50                   |

**Supplementary Table 3. Continued**

| SI No.                | Gene symbol            | Entrez IDs | Log fold change in SSNS | Log fold change in SRNS |
|-----------------------|------------------------|------------|-------------------------|-------------------------|
| 47                    | <i>A_33_P3287388</i>   | -          | -1.64                   | -1.61                   |
| 48                    | <i>SYPL2</i>           | 284612     | -1.91                   | -1.65                   |
| 49                    | <i>XLOC_005102</i>     | -          | -1.65                   | -1.78                   |
| 50                    | <i>ENST00000359888</i> | -          | -1.72                   | -1.81                   |
| 51                    | <i>OR4D11</i>          | 219986     | -2.22                   | -2.26                   |
| 52                    | <i>RASL12</i>          | 51285      | -2.43                   | -2.55                   |
| 53                    | <i>XLOC_003475</i>     | -          | -3.94                   | -4.06                   |
| 54                    | <i>ZIC1</i>            | 7545       | -4.13                   | -4.10                   |
| 55                    | <i>SNORD115-1</i>      | 338433     | -4.97                   | -5.11                   |
| <b>Unique to SSNS</b> |                        |            |                         |                         |
| 56                    | <i>EGR4</i>            | 1961       | 2.04                    | 1.40                    |
| 57                    | <i>FOS</i>             | 2353       | 1.99                    | 1.12                    |
| 58                    | <i>SOC53</i>           | 9021       | 1.94                    | 1.35                    |
| 59                    | <i>CACNA1D</i>         | 776        | 1.66                    | 0.08                    |
| 60                    | <i>PER1</i>            | 5187       | 1.51                    | 1.46                    |
| 61                    | <i>DDIT4</i>           | 54541      | 1.48                    | 1.04                    |
| 62                    | <i>DDIT3</i>           | 1649       | 1.43                    | 0.84                    |
| 63                    | <i>XLOC_000699</i>     | -          | 1.41                    | 0.29                    |
| 64                    | <i>HES1</i>            | 3280       | 1.38                    | 0.99                    |
| 65                    | <i>TNF</i>             | 7124       | 1.34                    | 0.47                    |
| 66                    | <i>EGR3</i>            | 1960       | 1.33                    | 0.91                    |
| 67                    | <i>GABARAPL1</i>       | 23710      | 1.31                    | 0.28                    |
| 68                    | <i>CXCL2</i>           | 2920       | 1.19                    | 0.15                    |
| 69                    | <i>IER2</i>            | 9592       | 1.19                    | 0.88                    |
| 70                    | <i>CLCF1</i>           | 23539      | 1.15                    | 0.91                    |
| 71                    | <i>ID12-AS1</i>        | 55853      | 1.14                    | 0.72                    |
| 72                    | <i>NFKBID</i>          | 84807      | 1.10                    | 0.37                    |
| 73                    | <i>WNK2</i>            | 65268      | 1.07                    | 0.05                    |
| 74                    | <i>HBEGF</i>           | 1839       | 1.06                    | 0.62                    |
| 75                    | <i>OAS2</i>            | 4939       | 1.11                    | 0.37                    |
| 76                    | <i>ZBTB24</i>          | 9841       | 1.03                    | 0.01                    |
| 77                    | <i>XLOC_I2_000018</i>  | -          | 1.03                    | 0.06                    |
| 78                    | <i>BST2</i>            | 684        | 1.40                    | 0.82                    |
| 79                    | <i>NUAK2</i>           | 81788      | 1.02                    | 0.17                    |
| 80                    | <i>CHAC1</i>           | 79094      | 1.22                    | -0.04                   |
| 81                    | <i>IFI35</i>           | 3430       | 1.00                    | 0.63                    |
| 82                    | <i>EMR3</i>            | -          | 1.00                    | 0.22                    |
| 83                    | <i>UGT2A3</i>          | 79799      | -1.00                   | -0.87                   |
| 84                    | <i>XLOC_005847</i>     | -          | -1.00                   | -0.87                   |
| 85                    | <i>XLOC_006664</i>     | -          | -1.01                   | -1.15                   |
| 86                    | <i>SNORD38B</i>        | 94163      | -1.02                   | -0.74                   |
| 87                    | <i>XLOC_I2_003856</i>  | -          | -1.04                   | -0.68                   |
| 88                    | <i>DPRXP4</i>          | 503645     | -1.04                   | -0.81                   |
| 89                    | <i>AK091251</i>        | -          | -1.05                   | -0.83                   |
| 90                    | <i>FKBP1A</i>          | 2280       | -1.07                   | -0.12                   |
| 91                    | <i>LOC100507404</i>    | 100507404  | -1.07                   | -0.97                   |
| 92                    | <i>KCNQ1</i>           | 3784       | -1.08                   | -0.98                   |
| 93                    | <i>XLOC_007433</i>     | -          | -1.08                   | -0.72                   |

Supplementary Table 3. Continued

| SI No.                | Gene symbol            | Entrez IDs | Log fold change in SSNS | Log fold change in SRNS |
|-----------------------|------------------------|------------|-------------------------|-------------------------|
| 94                    | <i>ENST00000508993</i> | -          | -1.08                   | -0.58                   |
| 95                    | <i>PRINS</i>           | 100169750  | -1.11                   | -0.98                   |
| 96                    | <i>XLOC_I2_000636</i>  | -          | -1.11                   | -0.96                   |
| 97                    | <i>XLOC_013498</i>     | -          | -1.11                   | -1.09                   |
| 98                    | <i>LOC728606</i>       | 728606     | -1.19                   | -1.17                   |
| 99                    | <i>ENST00000330439</i> | -          | -1.21                   | -0.50                   |
| 100                   | <i>FLJ11710</i>        | 79904      | -1.22                   | -0.94                   |
| 101                   | <i>XLOC_007502</i>     | -          | -1.32                   | -1.46                   |
| 102                   | <i>LOC285456</i>       | 285456     | -1.33                   | -1.39                   |
| 103                   | <i>BPNT1</i>           | 10380      | -1.45                   | -1.37                   |
| 104                   | <i>XLOC_000429</i>     | -          | -3.54                   | -2.56                   |
| <b>Unique to SRNS</b> |                        |            |                         |                         |
| 105                   | <i>LOC100506924</i>    |            | 0.19                    | 2.76                    |
| 106                   | <i>LCE3C</i>           | 353144     | 0.00                    | 2.44                    |
| 107                   | <i>X56665</i>          |            | 0.32                    | 2.28                    |
| 108                   | <i>XLOC_010843</i>     |            | -0.01                   | 1.91                    |
| 109                   | <i>PCDHGA9</i>         | 56107      | -0.13                   | 1.85                    |
| 110                   | <i>XLOC_004959</i>     |            | 0.07                    | 1.82                    |
| 111                   | <i>ATP2A1</i>          | 487        | 0.35                    | 1.80                    |
| 112                   | <i>DKFZp451A211</i>    |            | 0.66                    | 1.76                    |
| 113                   | <i>SIK1</i>            | 150094     | 0.83                    | 1.66                    |
| 114                   | <i>SLC19A2</i>         | 10560      | 0.83                    | 1.64                    |
| 115                   | <i>TSC22D3</i>         | 1831       | 0.62                    | 1.59                    |
| 116                   | <i>DCUN1D2</i>         | 55208      | 0.08                    | 1.59                    |
| 117                   | <i>LINC00312</i>       | 29931      | 0.79                    | 1.56                    |
| 118                   | <i>XLOC_I2_006704</i>  |            | 0.67                    | 1.53                    |
| 119                   | <i>GPNMB</i>           | 10457      | 0.19                    | 1.41                    |
| 120                   | <i>KLF9</i>            | 687        | 0.96                    | 1.36                    |
| 121                   | <i>CAMKK1</i>          | 84254      | 0.66                    | 1.34                    |
| 122                   | <i>XLOC_001070</i>     | -          | -0.13                   | 1.31                    |
| 123                   | <i>XLOC_I2_007928</i>  | -          | 0.74                    | 1.30                    |
| 124                   | <i>NPTX1</i>           | 4884       | 0.28                    | 1.29                    |
| 125                   | <i>GDF6</i>            | 392255     | -0.01                   | 1.29                    |
| 126                   | <i>RGS2</i>            | 5997       | 0.35                    | 1.28                    |
| 127                   | <i>PHF8</i>            | 23582      | 0.88                    | 1.27                    |
| 128                   | <i>KLF4</i>            | 9314       | 0.80                    | 1.22                    |
| 129                   | <i>OTUD5</i>           | 55593      | 0.31                    | 1.17                    |
| 130                   | <i>BCOR</i>            | 54880      | 0.34                    | 1.17                    |
| 131                   | <i>AVPR1A</i>          | 552        | 0.28                    | 1.16                    |
| 132                   | <i>ING1</i>            | 3621       | 0.66                    | 1.16                    |
| 133                   | <i>RSAD2</i>           | 91543      | 0.98                    | 1.14                    |
| 134                   | <i>ANGPTL4</i>         | 51129      | 0.56                    | 1.12                    |
| 135                   | <i>XLOC_012017</i>     |            | 0.01                    | 1.12                    |
| 136                   | <i>IFITM1</i>          | 8519       | 0.96                    | 1.14                    |
| 137                   | <i>ENST00000526254</i> | 646522     | 0.11                    | 1.10                    |
| 138                   | <i>CD518305</i>        | -          | -0.04                   | 1.10                    |
| 139                   | <i>CHRNA3</i>          | 1136       | 0.07                    | 1.08                    |
| 140                   | <i>RAB42</i>           | 115273     | 0.57                    | 1.07                    |
| 141                   | <i>PDGFB</i>           | 5155       | 0.78                    | 1.06                    |
| 142                   | <i>EYS</i>             | 346007     | 0.35                    | 1.05                    |
| 143                   | <i>FAM43A</i>          | 131583     | 0.58                    | 1.04                    |

Supplementary Table 3. Continued

| SI No. | Gene symbol            | Entrez IDs | Log fold change in SSNS | Log fold change in SRNS |
|--------|------------------------|------------|-------------------------|-------------------------|
| 145    | <i>C15orf39</i>        | 56905      | 0.77                    | 1.02                    |
| 146    | <i>XAF1</i>            | 54739      | 0.83                    | 1.02                    |
| 147    | <i>RASGEF1B</i>        | 153020     | 0.82                    | 1.02                    |
| 148    | <i>XLOC_001784</i>     | -          | -0.01                   | 1.01                    |
| 149    | <i>TRIB1</i>           | 10221      | 0.69                    | 1.01                    |
| 150    | <i>TIPARP</i>          | 25976      | 0.97                    | 1.00                    |
| 151    | <i>CXCR7</i>           | 57007      | 0.49                    | 1.00                    |
| 152    | <i>MTRNR2L2</i>        | 100462981  | 0.15                    | -1.00                   |
| 153    | <i>EPM2AIP1</i>        | 9852       | -0.56                   | -1.01                   |
| 154    | <i>LYPD6</i>           | 130574     | -0.25                   | -1.02                   |
| 155    | <i>C7orf55</i>         | 154791     | -0.33                   | -1.03                   |
| 156    | <i>FAM185A</i>         | 222234     | -0.06                   | -1.03                   |
| 157    | <i>COASY</i>           | 80347      | 0.08                    | -1.03                   |
| 158    | <i>A_24_P349547</i>    | -          | 0.03                    | -1.03                   |
| 159    | <i>A_24_P606663</i>    | 100129882  | 0.22                    | -1.05                   |
| 160    | <i>LRRD1</i>           | 401387     | 0.08                    | -1.05                   |
| 161    | <i>POLH</i>            | 5429       | -0.03                   | -1.05                   |
| 162    | <i>CCNDBP1</i>         | 23582      | -0.11                   | -1.05                   |
| 163    | <i>SET</i>             | 6418       | 0.40                    | -1.06                   |
| 164    | <i>ANKRD6</i>          | 22881      | -0.09                   | -1.07                   |
| 165    | <i>LOC100507567</i>    | -          | -0.05                   | -1.08                   |
| 166    | <i>ENST00000459691</i> | -          | -0.57                   | -1.08                   |
| 167    | <i>A_33_P3329991</i>   | -          | -0.30                   | -1.08                   |
| 168    | <i>CETN3</i>           | 1070       | -0.16                   | -1.10                   |
| 169    | <i>LOC100507547</i>    | 100507547  | -0.17                   | -1.11                   |
| 170    | <i>A_33_P3382887</i>   | -          | -0.61                   | -1.11                   |
| 171    | <i>GALT</i>            | 2592       | 0.11                    | -1.12                   |
| 172    | <i>AQP7P1</i>          | 375719     | 0.11                    | -1.16                   |
| 173    | <i>TRIM66</i>          | 9866       | -0.26                   | -1.17                   |
| 174    | <i>ENST00000377803</i> | 8364       | -0.60                   | -1.17                   |
| 175    | <i>PPFIBP1</i>         | 8496       | 0.02                    | -1.17                   |
| 176    | <i>PAN3-AS1</i>        | 100288730  | -0.59                   | -1.17                   |
| 177    | <i>UNK</i>             | 85451      | 0.03                    | -1.19                   |
| 178    | <i>A_33_P3316379</i>   | -          | 0.02                    | -1.20                   |
| 179    | <i>LOC100652804</i>    | -          | -0.45                   | -1.20                   |
| 180    | <i>KCNJ2</i>           | 3759       | -0.39                   | -1.21                   |
| 181    | <i>RPS12</i>           | 6206       | -0.07                   | -1.21                   |
| 182    | <i>LOC100289230</i>    | 100289230  | -0.64                   | -1.32                   |
| 183    | <i>UQCRBP1</i>         | 442454     | 0.06                    | -1.35                   |
| 184    | <i>KIAA0754</i>        | 643314     | -0.54                   | -1.43                   |
| 185    | <i>THC2554858</i>      | -          | 0.07                    | -1.49                   |
| 186    | <i>STK19</i>           | 8859       | 0.78                    | -1.59                   |
| 187    | <i>PGAM4</i>           | 441531     | -0.38                   | -1.95                   |

SI. No 1-55 comprises of significant DEGs common to both the diseased groups. SI. No 56- 104 are significant only in SSNS group while SI. No 105-187 are significant only in SRNS group.

SSNS, steroid-susceptible nephrotic syndrome; SRNS, steroid-resistant nephrotic syndrome.
