# Supplementary material for: Expression profiling of cultured podocytes exposed to nephrotic plasma reveals intrinsic molecular signatures of nephrotic syndrome
Source: PubMed Central journal article supplement — Clin Exp Pediatr. 2020 Nov 1;64(7):355–63. doi: 10.3345/cep.2020.00619 (PMC8255511; doi:10.3345/cep.2020.00619), 2020-11-01
Supplement: cep-2020-00619-suppl4.pdf [file cep-2020-00619-suppl4.pdf]

**Supplementary Table 4A. Gene ontology biological processes – SSNS vs. control**

| SL No. | Name of the process                                                                | Overlap of genes | Members                                                                                                                                                                                                                                                                                                       |
|--------|------------------------------------------------------------------------------------|------------------|---------------------------------------------------------------------------------------------------------------------------------------------------------------------------------------------------------------------------------------------------------------------------------------------------------------|
| 1      | Type I interferon signalling pathway                                               | 9                | <i>EGR1</i> (1058), <i>IFI6</i> (2537), <i>OAS2</i> (4939), <i>SOCS3</i> (9021), <i>MX2</i> (4600), <i>BST2</i> (684), <i>OASL</i> (8638), <i>IFIT3</i> (3437), <i>IFI35</i> (3430)                                                                                                                           |
| 2      | Cellular response to gonadotropin stimulus                                         | 4                | <i>EGR1</i> (1058), <i>EGR2</i> (1059), <i>EGR3</i> (1060), <i>EGR4</i> (1061),                                                                                                                                                                                                                               |
| 3      | Negative regulation of transcription from RNA polymerase II promoter               | 15               | <i>TNF</i> (7124), <i>ATF3</i> (467), <i>DDIT3</i> (1649), <i>DLX2</i> (1746), <i>EGR1</i> (1058), <i>FOSB</i> (2354), <i>HES1</i> (3280), <i>ID1</i> (3397), <i>ID3</i> (3399), <i>JUNB</i> (7326), <i>SMAD7</i> (4092), <i>PER1</i> (5187), <i>SNAI1</i> (6616), <i>KLF10</i> (7071), <i>BHLHE40</i> (8553) |
| 4      | Circadian rhythm                                                                   | 7                | <i>EGR1</i> (1058), <i>ID1</i> (3397), <i>ID3</i> (3399), <i>PER1</i> (5187), <i>KLF10</i> (7071), <i>BHLHE40</i> (8553), <i>EGR3</i> (1059)                                                                                                                                                                  |
| 5      | Cytokine-mediated signaling pathway                                                | 10               | <i>EGR1</i> (1058), <i>IFI6</i> (2537), <i>OAS2</i> (4939), <i>SOCS3</i> (9021), <i>MX2</i> (4600), <i>BST2</i> (684), <i>CLCF1</i> (23539), <i>OASL</i> (8638), <i>IFIT3</i> (3437), <i>IFI35</i> (3430)                                                                                                     |
| 6      | Response to virus                                                                  | 7                | <i>BCL3</i> (602), <i>TNF</i> (7124), <i>OAS2</i> (4939), <i>MX2</i> (4600), <i>BST2</i> (684), <i>OASL</i> (8638), <i>IFIT3</i> (3437)                                                                                                                                                                       |
| 7      | Cellular response to cAMP                                                          | 5                | <i>EGR1</i> (1058), <i>EGR3</i> (1060), <i>KCNQ1</i> (3784), <i>EGR2</i> (1059), <i>EGR4</i> (1061)                                                                                                                                                                                                           |
| 8      | Response to cAMP                                                                   | 5                | <i>FOSB</i> (2354), <i>JUNB</i> (7326), <i>PER1</i> (5187), <i>DUSP1</i> (1843), <i>FOS</i> (2353)                                                                                                                                                                                                            |
| 9      | Defense response to virus                                                          | 7                | <i>DDIT4</i> (54541), <i>OAS2</i> (4939), <i>MX2</i> (4600), <i>IFI44L</i> (10964), <i>BST2</i> (684), <i>OASL</i> (8638), <i>IFIT3</i> (3437)                                                                                                                                                                |
| 10     | Negative regulation of sequence-specific DNA binding transcription factor activity | 5                | <i>DDIT3</i> (1649), <i>ID1</i> (3397), <i>ID3</i> (3399), <i>SMAD7</i> (4092), <i>BHLHE40</i> (8553)                                                                                                                                                                                                         |

SSNS, steroid-susceptible nephrotic syndrome; cAMP, chronic kidney disease.

**Supplementary Table 4B. Gene ontology biological processes – SRNS vs. control**

| SL No. | Name of the process                                                                | Overlap of genes | Members                                                                                                                                                                                                                                                             |
|--------|------------------------------------------------------------------------------------|------------------|---------------------------------------------------------------------------------------------------------------------------------------------------------------------------------------------------------------------------------------------------------------------|
| 1      | Type I interferon signaling pathway                                                | 8                | <i>EGR1</i> (1058), <i>IFITM1</i> (8519), <i>RSAD2</i> (91543), <i>IFI6</i> (2537), <i>XAF1</i> (54739), <i>MX2</i> (4600), <i>OASL</i> (8638), <i>IFIT3</i> (3437)                                                                                                 |
| 2      | Circadian rhythm                                                                   | 6                | <i>EGR1</i> (1058), <i>ID1</i> (3397), <i>ID3</i> (3399), <i>KLF10</i> (7071), <i>BHLHE40</i> (8553), <i>KLF9</i> (687)                                                                                                                                             |
| 3      | Negative regulation of sequence-specific DNA binding transcription factor activity | 5                | <i>ID1</i> (3397), <i>ID3</i> (3399), <i>SMAD7</i> (4092), <i>BHLHE40</i> (8553), <i>TRIB1</i> (10221)                                                                                                                                                              |
| 4      | Cytokine-mediated signaling pathway                                                | 9                | <i>EGR1</i> (1058), <i>IFITM1</i> (8519), <i>RSAD2</i> (91543), <i>IFI6</i> (2537), <i>XAF1</i> (54739), <i>MX2</i> (4600), <i>CSF3</i> (1440), <i>OASL</i> (8638), <i>IFIT3</i> (3437)                                                                             |
| 5      | Response to virus                                                                  | 6                | <i>BCL3</i> (602), <i>IFITM1</i> (8519), <i>RSAD2</i> (91543), <i>MX2</i> (4600), <i>OASL</i> (8638), <i>IFIT3</i> (3437)                                                                                                                                           |
| 6      | Negative regulation of transcription from RNA polymerase II promoter               | 13               | <i>DLX2</i> (1746), <i>TSC22D3</i> , <i>EGR</i> (1058), <i>FOSB</i> (2354), <i>ID1</i> (3397), <i>ID3</i> (3399), <i>JUNB</i> (7326), <i>SMAD7</i> (4092), <i>SNAI1</i> (6616), <i>KLF10</i> (7071), <i>BHLHE40</i> (8553), <i>KLF4</i> (9314), <i>BCOR</i> (54880) |
| 7      | Response to corticosterone                                                         | 3                | <i>FOSB</i> (2354), <i>JUNB</i> (7326), <i>AVPR1A</i> (552)                                                                                                                                                                                                         |
| 8      | Defense response to virus                                                          | 6                | <i>IFITM1</i> (8519), <i>RSAD2</i> (91543), <i>MX2</i> (4600), <i>IFI44L</i> (10964), <i>OASL</i> (8638), <i>IFIT3</i> (3437)                                                                                                                                       |
| 9      | Platelet-derived growth factor receptor signaling pathway                          | 3                | <i>TIPARP</i> (25976), <i>PDGFB</i> (5155), <i>CSRNP1</i> (64651)                                                                                                                                                                                                   |
| 10     | Cellular response to hormone stimulus                                              | 4                | <i>FOSB</i> (2354), <i>JUNB</i> (7326), <i>DUSP1</i> (1843), <i>AVPR1A</i> (552)                                                                                                                                                                                    |

SRNS, steroid-resistant nephrotic syndrome.
