# Supplementary material for: Expression profiling of cultured podocytes exposed to nephrotic plasma reveals intrinsic molecular signatures of nephrotic syndrome
Source: PubMed Central journal article supplement — Clin Exp Pediatr. 2020 Nov 1;64(7):355–63. doi: 10.3345/cep.2020.00619 (PMC8255511; doi:10.3345/cep.2020.00619), 2020-11-01
Supplement: cep-2020-00619-suppl5.pdf [file cep-2020-00619-suppl5.pdf]

**Supplementary Table 5A. Gene ontology molecular function – SSNS vs. control**

| SL No. | Name of the function                                                           | Overlap of genes | Members                                                                                                                                                                                                                                                                                                                                                                    |
|--------|--------------------------------------------------------------------------------|------------------|----------------------------------------------------------------------------------------------------------------------------------------------------------------------------------------------------------------------------------------------------------------------------------------------------------------------------------------------------------------------------|
| 1      | Sequence-specific DNA binding transcription factor activity                    | 18               | <i>ATF3</i> (467), <i>DDIT3</i> (1649), <i>EGR1</i> (1058), <i>EGR2</i> (1059), <i>FOS</i> (2353), <i>BHLHE40</i> (8553), <i>KLF10</i> (7071), <i>HES1</i> (3280), <i>CSRNP1</i> (64651), <i>DLX2</i> (1746), <i>FOSB</i> (2354), <i>BCL3</i> (602), <i>EGR3</i> (1060), <i>EGR4</i> (1061), <i>ID1</i> (3397), <i>ID3</i> (3399), <i>SMAD7</i> (4092), <i>ZIC1</i> (7545) |
| 2      | Transcription factor binding                                                   | 9                | <i>DDIT3</i> (1649), <i>EGR1</i> (1058), <i>JUNB</i> (7326), <i>PER1</i> (5187), <i>FOS</i> (2353), <i>HES1</i> (3280), <i>FOSB</i> (2354), <i>BCL3</i> (602), <i>ID3</i> (3399)                                                                                                                                                                                           |
| 3      | Transcription regulatory region sequence-specific DNA binding                  | 3                | <i>ATF3</i> (467), <i>DDIT3</i> (1649), <i>EGR1</i> (1058)                                                                                                                                                                                                                                                                                                                 |
| 4      | Transcription regulatory region DNA binding                                    | 6                | <i>ATF3</i> (467), <i>DDIT3</i> (1649), <i>EGR2</i> (1059), <i>FOS</i> (2353), <i>TNF</i> (7124), <i>SMAD7</i> (4092)                                                                                                                                                                                                                                                      |
| 5      | Transcription factor activity involved in negative regulation of transcription | 4                | <i>ATF3</i> (467), <i>SNAI1</i> (6616), <i>BHLHE40</i> (8553), <i>HES1</i> (3280)                                                                                                                                                                                                                                                                                          |
| 6      | Double-stranded DNA binding                                                    | 4                | <i>EGR1</i> (1058), <i>JUNB</i> (7326), <i>FOS</i> (2353), <i>FOSB</i> (2354)                                                                                                                                                                                                                                                                                              |
| 7      | Transcription corepressor activity                                             | 5                | <i>ATF3</i> (467), <i>DDIT3</i> (1649), <i>JUNB</i> (7326), <i>BHLHE40</i> (8553), <i>ID3</i> (3399)                                                                                                                                                                                                                                                                       |
| 8      | RNA polymerase II core promoter proximal region sequence-specific DNA binding  | 5                | <i>ATF3</i> (467), <i>DDIT3</i> (1649), <i>EGR2</i> (1059), <i>JUNB</i> (7326), <i>PER1</i> (5187)                                                                                                                                                                                                                                                                         |
| 9      | Transcription factor activity involved in positive regulation of transcription | 4                | <i>DDIT3</i> (1649), <i>EGR1</i> (1058), <i>EGR2</i> (1059), <i>NR4A3</i> (8013)                                                                                                                                                                                                                                                                                           |
| 10     | Sequence-specific DNA binding                                                  | 6                | <i>EGR1</i> (1058), <i>NR4A3</i> (8013), <i>HES1</i> (3280), <i>CSRNP1</i> (64651), <i>DLX2</i> (1746), <i>FOSB</i> (2354)                                                                                                                                                                                                                                                 |

SSNS, steroid-susceptible nephrotic syndrome.

**Supplementary Table 5B. Gene ontology molecular function – SRNS vs. control**

| SL No. | Name of the function                                                           | Overlap of genes | Members                                                                                                                                                                                                                                                                                                           |
|--------|--------------------------------------------------------------------------------|------------------|-------------------------------------------------------------------------------------------------------------------------------------------------------------------------------------------------------------------------------------------------------------------------------------------------------------------|
| 1      | Sequence-specific DNA binding transcription factor activity                    | 15               | <i>EGR1</i> (1058), <i>EGR2</i> (1059), <i>BHLHE40</i> (8553), <i>KLF4</i> (9314), <i>KLF10</i> (7071), <i>CSRNP1</i> (64651), <i>DLX2</i> (1746), <i>FOSB</i> (2354), <i>BCL3</i> (602), <i>KLF9</i> (687), <i>TSC22D3</i> (1831), <i>ID1</i> (3397), <i>ID3</i> (3399), <i>SMAD7</i> (4092), <i>ZIC1</i> (7545) |
| 2      | Transcription factor binding                                                   | 7                | <i>EGR1</i> (1058), <i>JUNB</i> (7326), <i>FOSB</i> (2354), <i>BCL3</i> (602), <i>ID3</i> (3399), <i>BCOR</i> (54880), <i>TRIB1</i> (10221)                                                                                                                                                                       |
| 3      | Double-stranded DNA binding                                                    | 4                | <i>EGR1</i> (1058), <i>JUNB</i> (7326), <i>KLF4</i> (9314), <i>FOSB</i> (2354)                                                                                                                                                                                                                                    |
| 4      | Growth factor activity                                                         | 4                | <i>CSF3</i> (1440), <i>IL11</i> , <i>GDF6</i> (392255), <i>PDGFB</i> (5155)                                                                                                                                                                                                                                       |
| 5      | Transcription regulatory region DNA binding                                    | 4                | <i>EGR2</i> (1059), <i>KLF4</i> (9314), <i>SMAD7</i> (4092), <i>BCOR</i> (54880)                                                                                                                                                                                                                                  |
| 6      | Transcription corepressor activity                                             | 4                | <i>JUNB</i> (7326), <i>BHLHE40</i> (8553), <i>ID3</i> (3399), <i>BCOR</i> (54880)                                                                                                                                                                                                                                 |
| 7      | Transcription factor activity involved in positive regulation of transcription | 4                | <i>EGR1</i> (1058), <i>EGR2</i> (1059), <i>KLF4</i> (9314), <i>NR4A3</i> (8013)                                                                                                                                                                                                                                   |
| 8      | GTPase activity                                                                | 4                | <i>RHOB</i> , <i>MX2</i> (4600), <i>RASD1</i> (51655), <i>RAB42</i> (115273)                                                                                                                                                                                                                                      |
| 9      | GTP binding                                                                    | 5                | <i>RHOB</i> , <i>MX2</i> (4600), <i>RASD1</i> (51655), <i>RAB42</i> (115273), <i>RASL12</i> (51285)                                                                                                                                                                                                               |
| 10     | cytokine activity                                                              | 3                | <i>CSF3</i> (1440), <i>IL11</i> (3589), <i>GDF6</i> (392255)                                                                                                                                                                                                                                                      |

SRNS, steroid-resistant nephrotic syndrome.
