# Supplementary material for: Expression profiling of cultured podocytes exposed to nephrotic plasma reveals intrinsic molecular signatures of nephrotic syndrome
Source: PubMed Central journal article supplement — Clin Exp Pediatr. 2020 Nov 1;64(7):355–63. doi: 10.3345/cep.2020.00619 (PMC8255511; doi:10.3345/cep.2020.00619), 2020-11-01
Supplement: cep-2020-00619-suppl6.pdf [file cep-2020-00619-suppl6.pdf]

**Supplementary Table 6. Significant DEGs between SRNS and SSNS**

| Gene symbol           | Entrez IDs | Description                                                                                    | Log fold change | Pathway                                      |
|-----------------------|------------|------------------------------------------------------------------------------------------------|-----------------|----------------------------------------------|
| <i>FMC1</i>           | 154791     | FMC1 (formation of mitochondrial complex V assembly factor 1 homolog) is a protein coding gene | 1.35            | Mitochondrial organisation                   |
| <i>RPS12</i>          | 6206       | 40S ribosomal protein 12S                                                                      | 1.14            | Translation                                  |
| <i>XLOC_I2_007656</i> |            | Long intergenic noncoding RNA                                                                  | 1.21            | -                                            |
| <i>A_24_P341731</i>   |            | Reporter identifier                                                                            | 1.06            | -                                            |
| <i>GDF6</i>           | 392255     | Growth differentiation factor 6                                                                | -1.3            | TGF-β signalling pathway                     |
| <i>LOC100507567</i>   |            | RAB11B antisense RNA 1                                                                         | 1.03            | -                                            |
| <i>NPM3</i>           | 10360      | Nucleophosmin/nucleoplasmin 3                                                                  | -1.55           | Systemic lupus erythematosus                 |
| <i>A_33_P3316379</i>  |            | Glycoprotein A33                                                                               | 1.22            | Cell-cell junctions                          |
| <i>C9orf69</i>        | 90120      | Transmembrane protein 250                                                                      | -1.16           | -                                            |
| <i>LTBR</i>           | 4055       | Lymphotoxin beta receptor                                                                      | 1.11            | NF-κB signaling pathway                      |
| <i>TAGLN2</i>         | 8407       | Transgelin 2                                                                                   | 1.03            | Fc gamma R-mediated phagocytosis             |
| <i>COPS7A</i>         | 50813      | COP9 signalosome subunit 7A                                                                    | 1               | DNA damage recognition in GG-NER             |
| <i>GBA</i>            | 2629       | Glucosylceramidase beta                                                                        | 1.1             | Sphingolipid metabolism                      |
| <i>EML2</i>           | 24139      | EML2 (echinoderm microtubule associated protein like 2) is a protein coding gene               | 1.33            | Pathogenic <i>Escherichia coli</i> infection |
| <i>GHRLOS</i>         | 100126793  | Ghrelin opposite strand/antisense RNA                                                          | 1.13            | -                                            |
| <i>NCAPG2</i>         | 54892      | Non-SMC condensin II complex subunit G2                                                        | 1.14            | Cell cycle                                   |
| <i>SKIV2L</i>         | 6499       | Ski2 like RNA helicase                                                                         | 1               | RNA degradation                              |
| <i>SPNS1</i>          | 83985      | Sphingolipid transporter 1 (putative)                                                          | 1.28            | -                                            |
| <i>STK19</i>          | 8859       | Serine/threonine kinase 19                                                                     | 1.95            | <i>Staphylococcus aureus</i> infection       |
| <i>ZBTB17</i>         | 7709       | Zinc finger and BTB domain containing                                                          | 1.01            | TGF-beta signaling pathway                   |
| <i>BAP1</i>           | 8314       | BRCA1 associated protein 1                                                                     | 1.04            | Ribosome                                     |
| <i>ZNF768</i>         | 79724      | Zinc finger protein 768                                                                        | 1.03            | -                                            |
| <i>ANXA6</i>          | 309        | Annexin A6                                                                                     | -1.1            | Signaling by Interleukins                    |
| <i>COASY</i>          | 80347      | Coenzyme A synthase                                                                            | 1.11            | Metabolic pathways                           |
| <i>XLOC_000379</i>    |            | Unknown                                                                                        | -1.04           | -                                            |
| <i>CCNA1</i>          | 8900       | Cyclin A1                                                                                      | -1.18           | Cell cycle                                   |
| <i>CD518305</i>       |            | Unknown                                                                                        | -1.14           | -                                            |
| <i>XLOC_001784</i>    |            | Unknown                                                                                        | -1.02           | -                                            |
| <i>NPTX1</i>          | 4884       | Neuronal pentraxin 1                                                                           | -1.01           | -                                            |
| <i>DKFZp451A211</i>   |            | Collagen alpha-1(II) chain-like                                                                | -1.09           | -                                            |
| <i>PCDHGA9</i>        | 56107      | Protocadherin gamma subfamily A, 9                                                             | -1.98           | -                                            |
| <i>XLOC_010843</i>    |            | Transcription box family protein                                                               | -1.92           | -                                            |

DEG, differentially expressed gene; SRNS, steroid-resistant nephrotic syndrome; SSNS, steroid-susceptible nephrotic syndrome; TGF, transforming growth factor; NF-κB, nuclear factor kappa B; GG-NER, global genome NER.
