# Supplementary material for: Expression profiling of cultured podocytes exposed to nephrotic plasma reveals intrinsic molecular signatures of nephrotic syndrome
Source: PubMed Central journal article supplement — Clin Exp Pediatr. 2020 Nov 1;64(7):355–63. doi: 10.3345/cep.2020.00619 (PMC8255511; doi:10.3345/cep.2020.00619), 2020-11-01
Supplement: cep-2020-00619-suppl7.pdf [file cep-2020-00619-suppl7.pdf]

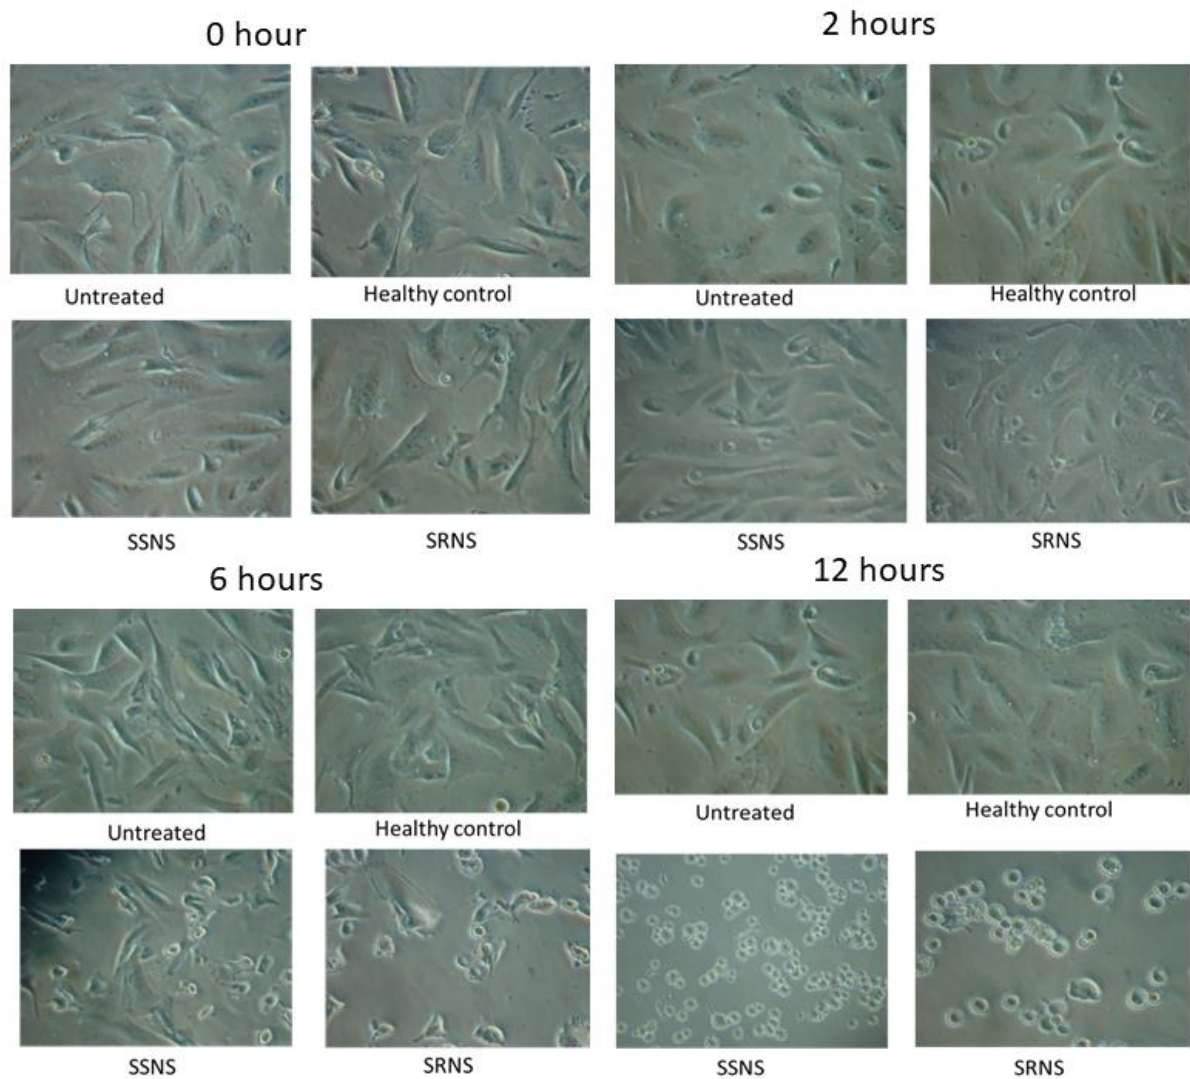

**Supplementary Fig. 1.** Podocyte cell morphology at different time points following exposure to plasma from individuals with SSNS, SRNS, and healthy controls. Differentiated podocytes were treated with 5% plasma from healthy control, 1 SSNS, and 1 SRNS patients. The treated cells were incubated at 37°C for 12 hours and imaged at 0-, 2-, 6-, and 12-hour time points using an inverted microscope (Magnus, New Delhi, India) in  $\times 10$  magnification. Podocytes treated with SSNS as well as SRNS plasma showed morphological changes viz. rounding up of cells due to retraction of foot processes as early as 6 hours and cell detachment by 12 hours. However untreated podocytes and those treated with plasma from healthy controls did not show any visible changes. SSNS, steroid-susceptible nephrotic syndrome; SRNS, steroid-resistant nephrotic syndrome.
