# Supplementary material for: Expression profiling of cultured podocytes exposed to nephrotic plasma reveals intrinsic molecular signatures of nephrotic syndrome
Source: PubMed Central journal article supplement — Clin Exp Pediatr. 2020 Nov 1;64(7):355–63. doi: 10.3345/cep.2020.00619 (PMC8255511; doi:10.3345/cep.2020.00619), 2020-11-01
Supplement: cep-2020-00619-suppl9.pdf [file cep-2020-00619-suppl9.pdf]

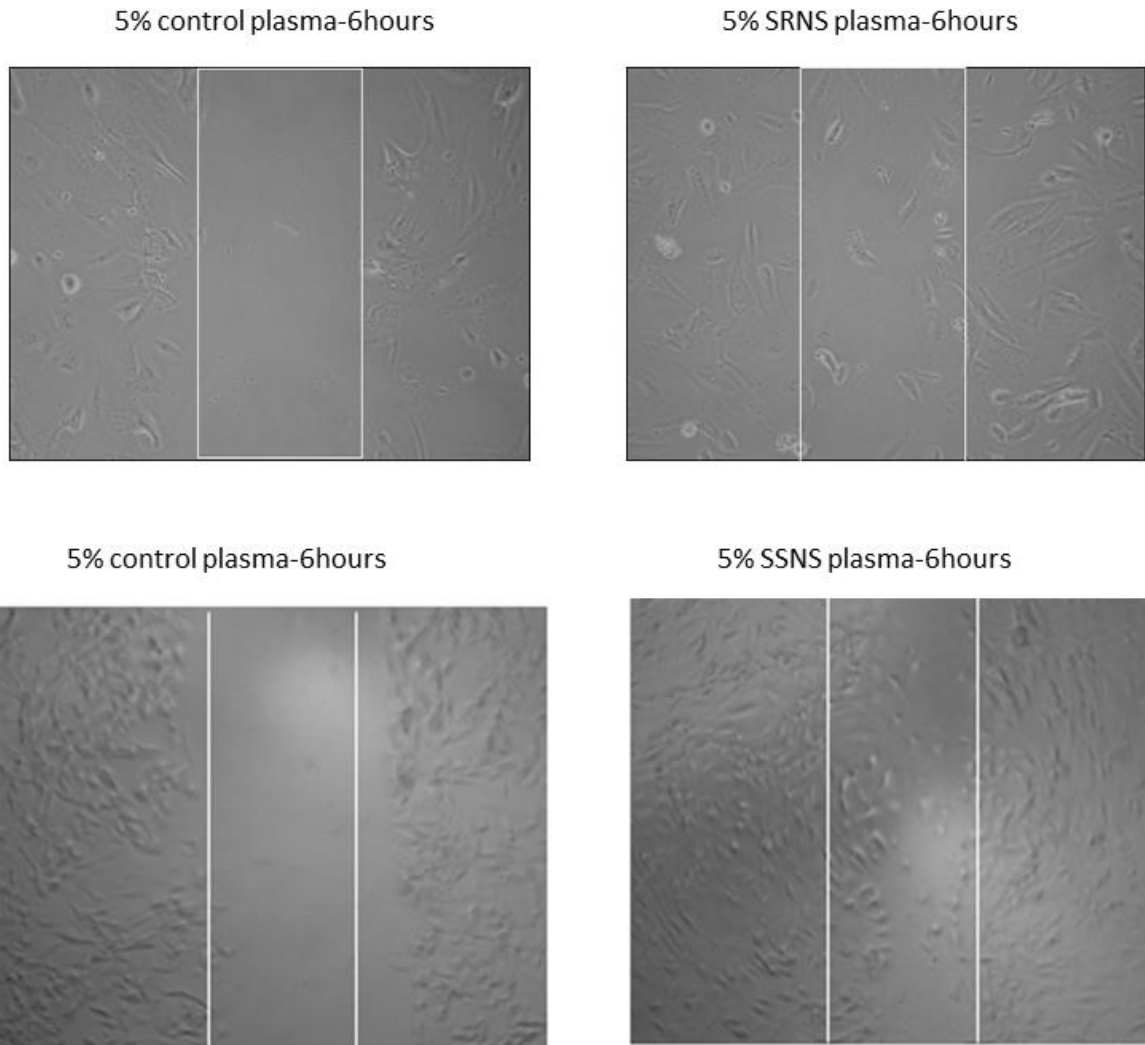

**Supplementary Fig. 3.** Scratch assay to compare motility of cells treated with 5% healthy or SRNS or SSNS plasma. A single scratch with a 200- $\mu$ L tip was performed in each well with differentiated podocytes. The cells were washed with 1XPBS and were treated with 5% plasma from healthy control, SRNS, and SSNS subjects. The treated cells were incubated at 37°C for 6 hours and then imaged using an inverted microscope (Magnus, New Delhi, India). Cells treated with plasma from SRNS as well as SSNS showed motility due to detachment of foot process while such motility was not observed in podocytes treated with plasma from healthy controls. SSNS, steroid-susceptible nephrotic syndrome; SRNS, steroid-resistant nephrotic syndrome.
